# Supplementary material for: Knockdown of Musashi RNA Binding Proteins Decreases Radioresistance but Enhances Cell Motility and Invasion in Triple-Negative Breast Cancer
Source: PubMed Central journal article supplement (PMC7139790; doi:10.3390/ijms21062169), 2020-03-21
Supplement: ijms-21-02169-s001.pdf [file ijms-21-02169-s001.pdf]

## Supplementary Materials

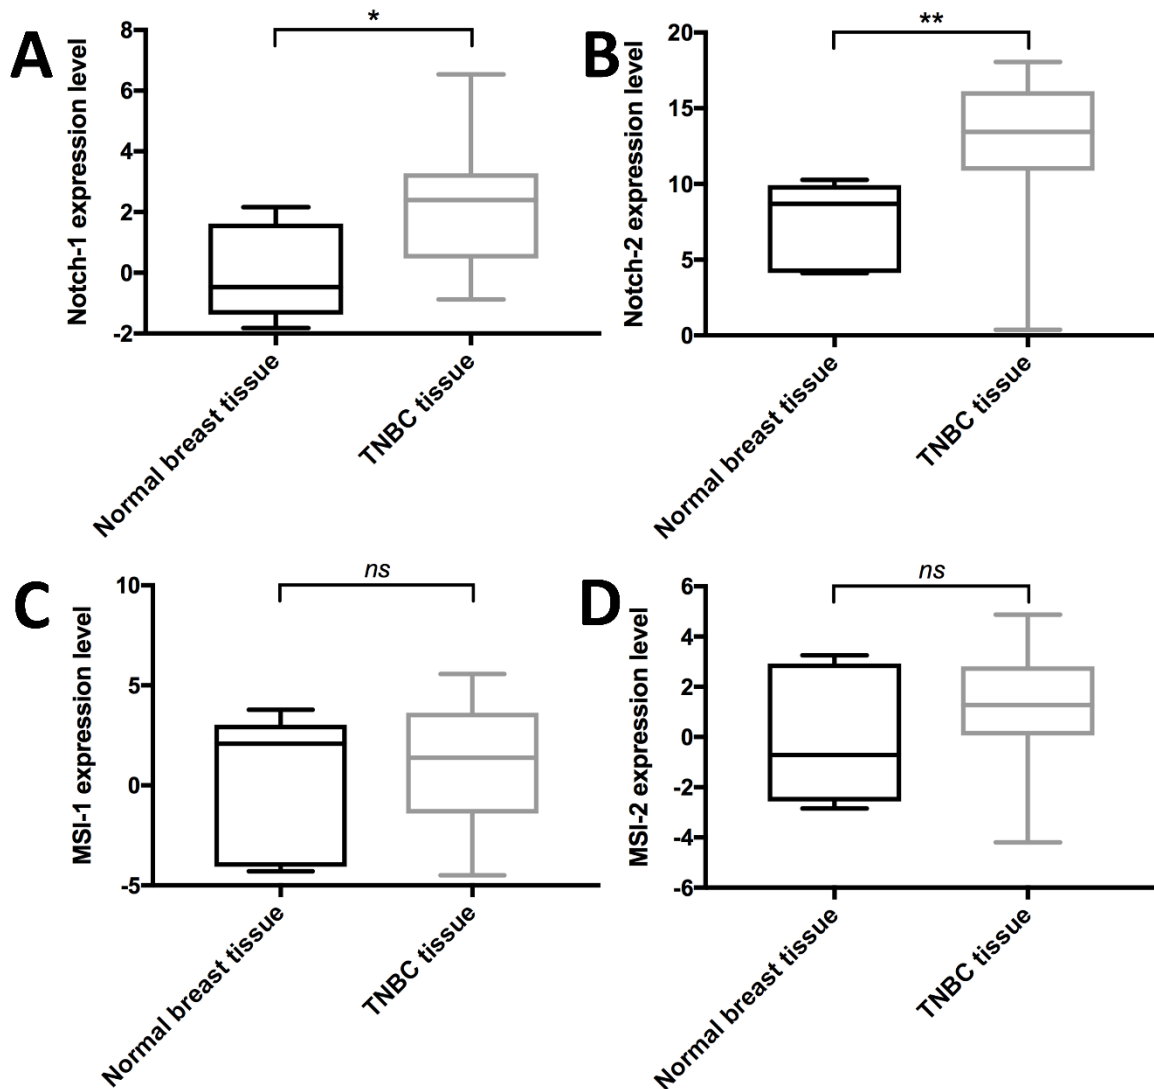

**Supplementary figure S1.** Differences in expression between normal breast tissue samples ( $n = 5$ ) and triple-negative breast cancer (TNBC) samples ( $n = 19$ ) were assessed via quantitative polymerase chain reaction (qPCR). After normalization to the housekeeping gene, respective gene expression was evaluated using the  $2^{-\Delta\Delta Ct}$  method with data then presented as log<sub>2</sub>-transformed fold change. Mann Whitney U test was used for correlation (\*  $p < 0.05$ , \*\*  $p < 0.01$ , boxplot indicates interquartile range). **S1A:** *Notch-1* expression is higher in TNBC tissues compared to normal breast tissues ( $p < 0.05$ ). **S1B:** *Notch-2* expression is higher in TNBC tissues compared to normal breast tissues ( $p < 0.01$ ). **S1C:** *MSI-1* expression is not significantly different in TNBC tissues when compared to normal breast tissues ( $p > 0.05$ ). **S1D:** *MSI-2* expression is not significantly different in TNBC tissues when compared to normal breast tissues ( $p > 0.05$ ).

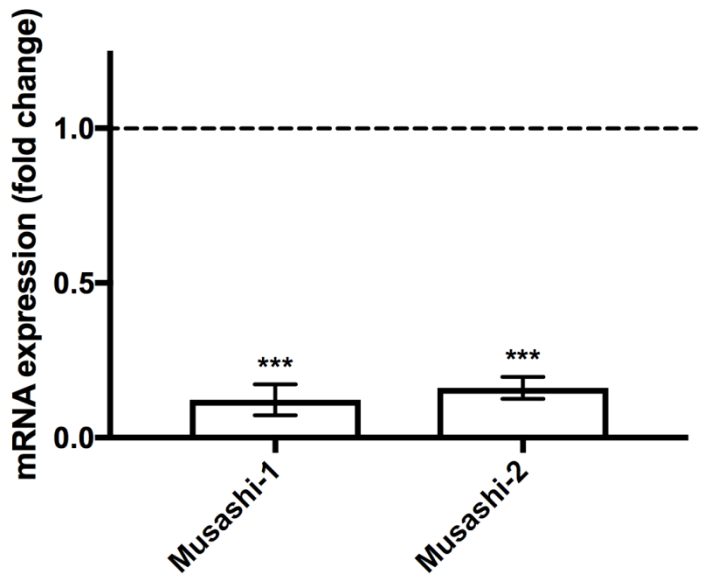

**Supplementary Figure S2.** *Musashi-1* (*MSI-1*) and *Musashi-2* (*MSI-2*) levels subsequent to knockdown with *MSI-1* & *MSI-2* siRNA, as quantified by quantitative polymerase chain reaction (qPCR). Both mRNAs were repressed by roughly 80%. Cells were transfected with a control siRNA and *MSI-1* & *MSI-2* siRNA, respectively, as detailed in the methods section (at least  $n = 3$ , \*\*\*  $p < 0.001$ , error bars indicate standard error of the mean (s.e.m.)).

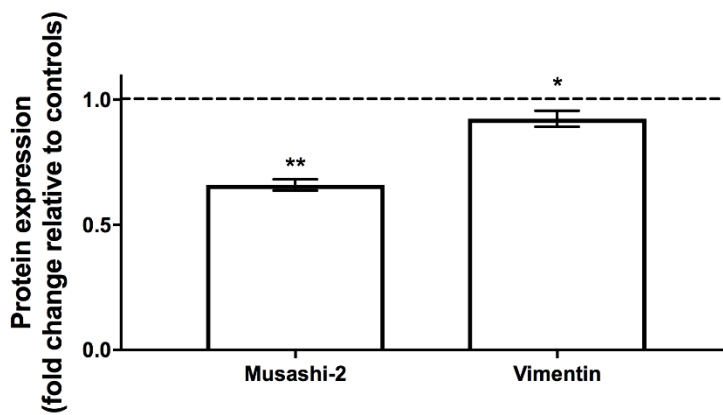

**Supplementary Figure S3:** Changes in *MSI-2* and Vimentin protein levels subsequent to knockdown with *MSI-1* & *MSI-2* siRNA, as quantified by western blot. Cells were transfected with a control siRNA and *MSI-1* & *MSI-2* siRNA, respectively, as detailed in the methods section (at least  $n = 3$ , \*  $p < 0.05$ , \*\*  $p < 0.01$ , error bars indicate standard error of the mean (s.e.m.))

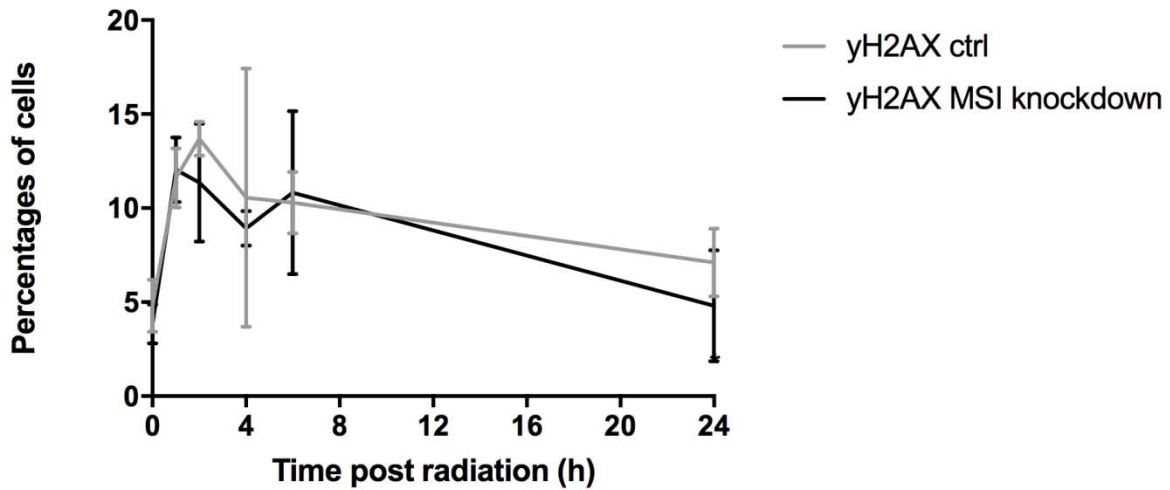

**Supplementary Figure S4.**  $\gamma$ H2AX measurements in *Musashi* (*MSI*) knockdown cells and respective controls. No significant differences were observed at all timepoints. Cells were transfected with a control siRNA and *MSI-1* & *MSI-2* siRNA, respectively, as detailed in the methods section.

**Supplementary Table S1.** siRNAs used for experiments.

| siRNA                   | Manufacturer             | Manufacturer ID | UniGene ID |
|-------------------------|--------------------------|-----------------|------------|
| <i>MSI-1</i>            | Thermo Fisher Scientific | S8980           | Hs.158311  |
| <i>MSI-2</i>            | Thermo Fisher Scientific | S42757          | Hs.658922  |
| <i>Negative control</i> | Thermo Fisher Scientific | 4390843         | -          |

**Supplementary Table S2.** TaqMan primers used for qPCR experiments.

| Gene            | Manufacturer                              | Primer Sequence                                                                                    |
|-----------------|-------------------------------------------|----------------------------------------------------------------------------------------------------|
| <i>mnumb</i>    | Thermo Fisher Scientific<br>hs00377772-M1 | <i>Full product details can be found on the manufacturer's website using the catalogue number.</i> |
| <i>Notch-1</i>  | Thermo Fisher Scientific<br>hs00413187_M1 |                                                                                                    |
| <i>Notch-2</i>  | Thermo Fisher Scientific<br>hs01050719_M1 |                                                                                                    |
| <i>hes2</i>     | Thermo Fisher Scientific<br>hs00219505_M1 |                                                                                                    |
| <i>GBX2</i>     | Thermo Fisher Scientific<br>hs00230965_M1 |                                                                                                    |
| <i>LIFR</i>     | Thermo Fisher Scientific<br>hs01123581_M1 |                                                                                                    |
| <i>vimentin</i> | Biologio (Nijmegen, The Netherlands)      |                                                                                                    |
| <i>GAPDH</i>    | Biologio                                  | Fwd: CCCAGCAAGAGCACAAGAGG<br>Rev: GGTCTACATGGCAACTGTGAGGA                                          |

**Supplementary Table S3.** Antibodies used for western blotting.

| <b>Target</b>                      | <b>Manufacturer</b>                  | <b>Catalogue number</b> |
|------------------------------------|--------------------------------------|-------------------------|
| MSI-2                              | Santa Cruz                           | SC-83160                |
| Vimentin                           | Santa Cruz                           | SC-32322                |
| DNA-PKcs                           | R&D-Systems                          | AF3415                  |
| EGFR                               | Abcam (Cambridge,<br>United Kingdom) | AB32430                 |
| Tubulin                            | Sigma-Aldrich                        | T5168                   |
| Rabbit Anti-Goat IgG<br>Peroxydase | Sigma-Aldrich                        | 401515                  |
| Goat-Anti-Rabbit IgG<br>Peroxidase | Sigma-Aldrich                        | 401353                  |
| Goat-Anti-Mouse IgG<br>HRP         | Sigma-Aldrich                        | 12-349                  |

**Supplementary Table S4.** Antibodies used for flow cytometry.

| <b>Target</b> | <b>Manufacturer</b> | <b>Catalogue number</b> |
|---------------|---------------------|-------------------------|
| CD44          | BD Biosciences      | 559942                  |
| LIFR          | R&D-Systems         | FAB249A                 |
| APC isotype   | BD Biosciences      | 555576                  |
| PE isotype    | R&D-Systems         | IC002A                  |
